# Supplementary material for: Analysis of Regulatory Framework for Produced Water Management and Reuse in Major Oil- and Gas-Producing Regions in the United States
Source: MDPI journal article supplement (doi:10.3390/w14142162), 2022-07-08
Supplement: s1 [file s1]

# Analysis of regulatory framework for produced water management and reuse in major oil and gas producing regions in the United States

Wenbin Jiang, Lu Lin, Xuesong Xu, Huiyao Wang, Pei Xu \*

Department of Civil Engineering, New Mexico State University, Las Cruces, NM 88003, USA;  
wbjiang@nmsu.edu (W.J.); linluedu@gmail.com (L.L.); xuesong@nmsu.edu (X.X.);  
[huiyao@nmsu.edu](mailto:huiyao@nmsu.edu) (H.W.); pxu@nmsu.edu (P.X.)

\* Correspondence: pxu@nmsu.edu

**Table S1.** General Permit WMGR123 Appendix A (39 constituents) from Pennsylvania.

| Constituent                     | Limit |
|---------------------------------|-------|
| Aluminum (mg/L)                 | 0.2   |
| Ammonia (mg/L)                  | 2     |
| Arsenic (µg/L)                  | 10    |
| Barium (mg/L)                   | 2     |
| Benzene (µg/L)                  | 0.12  |
| Beryllium (µg/L)                | 4     |
| Boron (mg/L)                    | 1.6   |
| Bromide (mg/L)                  | 0.1   |
| Butoxyethanol (mg/L)            | 0.7   |
| Cadmium (µg/L)                  | 0.16  |
| Chloride (mg/L)                 | 25    |
| Chromium (µg/L)                 | 10    |
| COD (mg/L)                      | 15    |
| Copper(µg/L)                    | 5     |
| Ethylene glycol (µg/L)          | 13    |
| Gross Alpha (pCi/L)             | 15    |
| Gross Beta (pCi/L)              | 1000  |
| Iron (mg/L)                     | 0.3   |
| Lead (µg/L)                     | 1.3   |
| Magnesium (mg/L)                | 10    |
| Manganese (mg/L)                | 0.2   |
| MBAS (surfactants)              | 0.5   |
| Methanol (mg/L)                 | 3.5   |
| Molybdenum (mg/L)               | 0.21  |
| Nickel (mg/L)                   | 0.03  |
| Nitrite-nitrate nitrogen (mg/L) | 2     |

|                                |         |
|--------------------------------|---------|
| Oil & grease (mg/L)            | ND      |
| pH                             | 6.5-8.5 |
| Radium (pCi/L)                 | 5       |
| Selenium (µg/L)                | 4.6     |
| Silver (µg/L)                  | 1.2     |
| Sodium (mg/L)                  | 25      |
| Strontium (mg/L)               | 4.2     |
| Sulfate (mg/L)                 | 25      |
| TDS (mg/L)                     | 500     |
| Toluene (Methylbenzene) (mg/L) | 0.33    |
| TSS (mg/L)                     | 45      |
| Uranium (µg/L)                 | 30      |
| Zinc (mg/L)                    | 0.065   |

**Table S2.** Alternative screening matrix for the produced water reuse in Oklahoma, prepared by the Produced Water Working Group.

| Scenario | Water Use                  | County   | Potential User(s)                             | Volume of Water Needed (BPD) | Volume of Water Produced in the county (BPD) | Treatment required | Regulatory Challenges | Selected for Economic Evaluation |
|----------|----------------------------|----------|-----------------------------------------------|------------------------------|----------------------------------------------|--------------------|-----------------------|----------------------------------|
| 1.a      | Agriculture/<br>Irrigation | Texas    | Heimsoth Partners                             | 217,739                      | 149,403                                      | Y                  | Y                     | N                                |
| 1.b      |                            | Texas    | Russell Family Partnership                    | 449,499                      | 149,403                                      | Y                  | Y                     | N                                |
| 1.c      |                            | Texas    | Fischer Family Farms LP                       | 227,681                      | 149,403                                      | Y                  | Y                     | N                                |
| 1.d      |                            | Texas    | Stephens Land & Cattle Co Inc.                | 195,477                      | 149,403                                      | Y                  | Y                     | N                                |
| 1.e      |                            | Texas    | Chemical Spray for Agriculture/<br>Irrigation | <10,000                      | 149,403                                      | Y                  | Y                     | N                                |
| 2.a      | Power                      | Pawnee   | Oklahoma Gas and Electric Company             | 1,550,729                    | 93,787                                       | Y                  | Y                     | Y                                |
| 2.b      |                            | Oklahoma | Oklahoma Gas and Electric Company             | 203,617                      | 191,323                                      | Y                  | Y                     | N                                |
| 2.c      |                            | Seminole | Oklahoma Gas and Electric Company             | 743,499                      | 329,065                                      | Y                  | Y                     | Y                                |

|     |                                           |                   |                                                                                |           |         |   |   |   |
|-----|-------------------------------------------|-------------------|--------------------------------------------------------------------------------|-----------|---------|---|---|---|
| 3.a | Mining                                    | Dewey             | Kauk Mike and LaDena                                                           | 223,199   | 122,762 | Y | Y | N |
| 4.a | Industrial                                | Muskogee          | Georgia-Pacific Consumer Products (Manufacturing of Consumer Products, Tissue) | 752,741   | 4,108   | Y | Y | N |
| 4.b |                                           | Kay               | Phillips Refinery                                                              | 131,748   | 173,719 | Y | Y | N |
| 4.c |                                           | Garfield          | Koch (Chemical Manufacturing)                                                  | 238,095   | 146,793 | Y | Y | N |
| 4.d |                                           | Grant             | Medford OK Natural Gas Liquids Fractionator                                    | 30,000    | 109,502 | Y | Y | Y |
| 5.a | Reuse Clean Brine- oil and Gas            | Alfalfa to Blaine | Oil and Gas - Transfer Produced Water from Mississippi Lime to Stack Play      | 250,000   | 600,560 | Y | Y | Y |
| 6.a | Aquifer Storage and Recovery- Oil and Gas | Alfalfa           | Oil and Gas - Store treated produced water in saline aquifer                   | NA        | 600,560 | Y | Y | N |
| 7.a | Surface Water Discharge                   | Beckham           | Irrigation - Lugert-Altus Irrigation District                                  | 1,819,025 | 22,323  | Y | Y | Y |
| 7.b |                                           | Grant             | Salt Fork Arkansas River (downstream of Great Salt Plains Lake)                | NA        | 109,502 | Y | Y | Y |

BPD: barrel per day.

NA: not available.

**Table S3.** Cost estimates for ten produced water use scenarios in Oklahoma, prepared by the Produced Water Working Group.

| Case | Case Description                          | Total Capital (\$Millions) | Capacity BWPD | County     | Assumed water TDS (mg/L) | Normalized \$/BW |
|------|-------------------------------------------|----------------------------|---------------|------------|--------------------------|------------------|
| 1    | Typical Source and Disposal- STACK &SCOOP | NA                         | NA            | Central OK | NA                       | 1.09             |
| 2    | Oil and gas reuse (treatment cost only)   | NA                         | NA            | State-wide | NA                       | 0.57             |
| 3    | Clean Brine Transfer & treatment          | 208                        | 200,000       | Alfalfa    | 213,000                  | 1.03             |
| 4    | Evaporation - low TDS (SCOOP & STACK)     | NA                         | 20,000+       | Blaine     | 17,000                   | 1.66             |
| 5    | Evaporation - high TDS (Miss. Lime)       | NA                         | 20,000+       | Alfalfa    | 213,000                  | 1.79             |
| 6    | Desalination for Surface Discharge        | 22                         | 15,000        | Beckham    | 9,000                    | 3.58             |
| 7    | Desalination for Power Use                | 88                         | 130,000       | Pawnee     | 125,000                  | 4.37             |
| 8    | Desalination for Power Use                | 95                         | 230,000       | Seminole   | 180,000                  | 4.43             |
| 9    | Desalination for Industrial Use           | 35                         | 30,000        | Grant      | 227,000                  | 7.41             |
| 10   | Desalination for Surface Discharge        | 38                         | 30,000        | Grant      | 227,000                  | 7.49             |

BW: barrel water. BWPD: barrel of water per day.

**Table S4.** Recommended Irrigation Water Risk-Based Comparison (RBC) Levels (mg/L) in California.

| <b>Inorganics</b> |       | <b>Organics</b>              |        |
|-------------------|-------|------------------------------|--------|
| Arsenic           | 0.1   | Acetone                      | 20,000 |
| Barium            | 2,000 | Benzene                      | 0.7    |
| Boron             | 70    | Ethylbenzene                 | 6      |
| Cadmium           | 70    | Ethylene Glycol              | 5000   |
| Chromium (VI)     | 0.4   | Methylene Chloride           | 2      |
| Fluoride          | 700   | Naphthalene                  | 200    |
| Mercury           | 20    | PAHs                         | 0.02   |
| Thallium          | 10    | Toluene                      | 500    |
| Zinc              | 2,000 | Total Petroleum Hydrocarbons | 200    |
|                   |       | Trimethylbenzene             | 200    |
|                   |       | Xylenes                      | 1000   |

**Table S5.** Oil and Gas wells permitting in Colorado Division of Water Resources

| Extraction only |                    |                      | Beneficial Use after Extraction |                      |
|-----------------|--------------------|----------------------|---------------------------------|----------------------|
|                 | Tributary          | Non-tributary        | Tributary                       | Non-tributary        |
| CBM well        | Permit required    | Permit required      | Permit required                 | Permit required      |
|                 | Replace depletion* | No replace depletion | Replace depletion               | No replace depletion |
| Non-CBM         | No permit required | No permit required   | Permit required                 | Permit required      |
|                 | Replace depletion  | No replace depletion | Replace depletion               | No replace depletion |

\* Replace depletions that impact an over-appropriated stream.

**Table S6.** Groundwater standards in Colorado

| Inorganic    |                       | Organic Compounds                                    |                          |
|--------------|-----------------------|------------------------------------------------------|--------------------------|
| Contaminants | Concentration         | Contaminants                                         | Concentration<br>µg/L    |
| TDS          | < 1.25x<br>background | Benzene                                              | 5                        |
| Chloride     | < 1.25x<br>background | Toluene                                              | 560-1000                 |
| Sulfate      | < 1.25x<br>background | Ethylbenzene                                         | 700                      |
|              |                       | Xylenes (Total)                                      | 1400-10,000              |
|              |                       | Liquid hydrocarbons, including<br>condensate and oil | Below detection<br>level |

**Table S7.** Soil quality criteria for road spreading of produced water in Colorado.

| Inorganic        |                              | Organic Compounds                                   |                          |
|------------------|------------------------------|-----------------------------------------------------|--------------------------|
| Contaminants     | Concentration<br>mg/kg       | Contaminants                                        | Concentration<br>mg/kg   |
| Arsenic          | 0.39                         | TPH                                                 | 500                      |
| Barium (Total)   | 15,000                       | Benzene                                             | 0.17                     |
| Boron            | 2 mg/L                       | Toluene                                             | 85                       |
| Cadmium          | 70                           | Ethylbenzene                                        | 100                      |
| Chromium (III)   | 120,000                      | Xylenes (total)                                     | 175                      |
| Chromium (VI)    | 23                           | Acenaphthene                                        | 1000                     |
| Copper           | 3100                         | Anthracene                                          | 1000                     |
| Lead             | 400                          | Benz(a)anthracene                                   | 0.22                     |
| Mercury          | 23                           | Benzo(b)fluoranthene                                | 0.22                     |
| Nickel (soluble) | 1600                         | Benzo(k)fluoranthene                                | 2.2                      |
| Selenium         | 390                          | Liquid hydrocarbons<br>including condensate and oil | Below detection<br>level |
| Silver           | 390                          |                                                     |                          |
| Zinc             | 23,000                       |                                                     |                          |
| pH               | 6-9                          |                                                     |                          |
| SAR              | <12                          |                                                     |                          |
| EC               | <4 mS/cm or 2x<br>background |                                                     |                          |

**Table S8.** Regulatory guidelines for road application of waste and wastewater in Wyoming.

| Testing criteria                                                         | Limit                   |
|--------------------------------------------------------------------------|-------------------------|
| pH                                                                       | 6-9                     |
| TDS                                                                      | -                       |
| Radium 226                                                               | 60 pCi/L                |
| Toxicity Characteristic Leaching Procedure (TCLP) for solids and sludges |                         |
| Total for water samples                                                  |                         |
| Benzene                                                                  | 0.5 mg/L                |
| TOX                                                                      | 0.13 mg/L               |
| Arsenic                                                                  | 5 mg/L                  |
| Barium                                                                   | 100 mg/L                |
| Cadmium                                                                  | 1 mg/L                  |
| Chromium                                                                 | 5 mg/L                  |
| Lead                                                                     | 5 mg/L                  |
| Mercury                                                                  | 0.2 mg/L                |
| Selenium                                                                 | 1 mg/L                  |
| Silver                                                                   | 5 mg/L                  |
| %Solids                                                                  | N/A                     |
| %TPH                                                                     | N/A                     |
| %Water                                                                   | N/A                     |
| TPH                                                                      | N/A                     |
| (Method 418.1)                                                           |                         |
| TPH (Cumulative)                                                         | 1.5 lbs/ft <sup>2</sup> |

Note: The WOGCC will allow a total constituent analysis (TOX) to be substituted for the halogenated organics listed in the TCLP constituents provided the following conditions are met:

1. The TOX test has a detection level of 0.1 mg/l;
2. The TOX test is run on a fluid extracted in accordance with the TCLP procedure;
3. If the TOX concentration exceeds any one of the appropriate individual constituent regulatory levels an analysis will be required for all individual TCLP constituents; and
4. The analysis of non-halogenated constituents may be required by the WOGCC, as necessary.

**Table S9.** CBM permitting guideline for discharges to irrigated drainages of the Powder River Basin, Wyoming.

|                   | Scenario 1                                                                                                                                                                                                                                                                                                                                                   | Scenario 2                                                                                                                                                                                                                 | Scenario 3                                                                                                                                                                                                                                                                                                                   | Scenario 4                                                                                                                                                                                                                                         |
|-------------------|--------------------------------------------------------------------------------------------------------------------------------------------------------------------------------------------------------------------------------------------------------------------------------------------------------------------------------------------------------------|----------------------------------------------------------------------------------------------------------------------------------------------------------------------------------------------------------------------------|------------------------------------------------------------------------------------------------------------------------------------------------------------------------------------------------------------------------------------------------------------------------------------------------------------------------------|----------------------------------------------------------------------------------------------------------------------------------------------------------------------------------------------------------------------------------------------------|
| Outfall           | <p>Monitor: Flow, EC, SAR, pH, HCO<sub>3</sub></p> <p>Threshold: EC &gt;7500 µS/cm<br/>pH=6.5-9.0</p> <p>Effluent limits: downstream class 2&amp;3 water protection</p> <p>Corrective Action: DEQ enforcement action</p>                                                                                                                                     | <p>Monitor: Same as Scenario 1.</p> <p>Threshold: EC &gt;7500 µS/cm<br/>pH=6.5-9.0; Effluent limits: downstream class 3 water protection.</p> <p>Corrective Action: Same as Scenario 1.</p>                                | <p>Monitor: Same as Scenario 1.</p> <p>Threshold: EC limit (published soil EC threshold value /1.5. Limit SAR (3-10) to &lt; 6.67 x EC (dS/m) -3.33</p> <p>If smectite soils, additional SAR restrictions.</p> <p>Corrective Action: Same as Scenario 1; If exceedance of E.C. or SAR: curtail direct discharge quantity</p> | <p>Monitor: Same as Scenario 1.</p> <p>Threshold: Effluent limits calculated using waste load allocation, discharge limits calculated using historic median streamflow during irrigation season.</p> <p>Corrective Action: Same as Scenario 1.</p> |
| Reservoir         | <p>Monitor: EC, SAR, pH, HCO<sub>3</sub>, water elevation &amp; volume</p> <p>Threshold: E.C.&gt;150% outfall E.C.; USDA soil EC/1.5; SAR: Hanson 2006</p> <p>Additional E.C. for smectite clays*</p> <p>Corrective Action: If flowing seep found, cease discharge, repair, or close reservoir. E.C.&gt;150% outfall E.C., cease discharge or scenario 2</p> | <p>Monitor: Same as Scenario 1.</p> <p>Threshold: Flowing seep visibly below reservoir</p> <p>Corrective Action: If flowing seep appears below reservoir, then cease discharge at outfall, repair, or close reservoir.</p> | N/A                                                                                                                                                                                                                                                                                                                          | N/A                                                                                                                                                                                                                                                |
| Ephemeral Channel | <p>Monitor: Flow, pH, E.C., Ca, Mg, Na, K, SO<sub>4</sub>, HCO<sub>3</sub>, carbon isotopes</p> <p>Threshold: N/A</p>                                                                                                                                                                                                                                        | N/A                                                                                                                                                                                                                        | <p>(Becoming perennialized Stream Channel)</p> <p>Monitor: Same as Scenario 1</p>                                                                                                                                                                                                                                            | Same as Scenario 3                                                                                                                                                                                                                                 |



|                     |                                                                                                                                                                                                                                                                                                                                            |                    |                                                                                                                         |                    |
|---------------------|--------------------------------------------------------------------------------------------------------------------------------------------------------------------------------------------------------------------------------------------------------------------------------------------------------------------------------------------|--------------------|-------------------------------------------------------------------------------------------------------------------------|--------------------|
|                     | Corrective Action: N/A                                                                                                                                                                                                                                                                                                                     |                    | Threshold: Same as Outfall in Scenario 3.                                                                               |                    |
|                     |                                                                                                                                                                                                                                                                                                                                            |                    | Corrective Action: exceeded over multiple months, adjust outfall limits downward, or eliminate contributing discharges. |                    |
| Groundwater         | <p>Monitor: Water level, pH, E.C., Ca, Mg, Na.</p> <p>Intensified monitor: additional K, SO<sub>4</sub>, HCO<sub>3</sub>, Cl, carbon isotopes</p> <p>Threshold: Lateral migration into stream channels, groundwater flow to irrigated fields.</p> <p>Corrective Action: If CBM causes groundwater elevation, cease outfall discharges.</p> | Same as Scenario 1 | N/A                                                                                                                     | N/A                |
| Shallow Groundwater | <p>Monitor: Same as groundwater.</p> <p>Threshold: First threshold groundwater &lt; 6 feet.</p> <p>Second threshold &lt; 3 feet</p> <p>Corrective Action: If first met, detect cause &amp; corrective action; If the second met, cease discharges</p>                                                                                      | N/A                | Same as Scenario 1                                                                                                      | N/A                |
| Soils               | <p>Monitor: For initial, texture, clay mineralogy, ESP, pH, E.C., SAR, SO<sub>4</sub>, HCO<sub>3</sub>, lime, O.C., N, P, K. For ongoing: pH, E.C., SAR, SO<sub>4</sub>, HCO<sub>3</sub>, Cl.</p>                                                                                                                                          | N/A                | Same as Scenario 1                                                                                                      | Same as Scenario 1 |

|                  |                                                                                                                                                                                                                                             |     |                    |                    |
|------------------|---------------------------------------------------------------------------------------------------------------------------------------------------------------------------------------------------------------------------------------------|-----|--------------------|--------------------|
|                  | <p>Threshold: EC/SAR increase &gt;15% or &gt;40% annually; ESP &gt; 10% or EC &gt; 4,000 <math>\mu</math>S/cm.</p> <p>Corrective Action: Reduce discharges, change discharge locations, improved drainage chemical amendments to fields</p> |     |                    |                    |
| Crops/<br>Forage | <p>Monitor: yield (tons/acre), crude protein (C.P.), Ca, P, K (annually); Se (Bi-annually).</p> <p>Threshold: Statistically significant decrease in yield or quality</p> <p>Corrective Action: Reclamation of any damaged fields.</p>       | N/A | Same as Scenario 1 | Same as Scenario 1 |

**Table S10.** Wyoming Department of Environmental Quality parameter list for produced water for beneficial use for land application.

|                                    |                                                                       |                              |              |
|------------------------------------|-----------------------------------------------------------------------|------------------------------|--------------|
| pH                                 | 4.5 - 9.0 s.u.                                                        | 4,6-dinitro-o-cresol         | 1.5 µg/L     |
| TDS                                | 480.0 mg/L                                                            | 2,4-dinitrophenol            | 39 µg/L      |
| Electrical Conductivity (EC)       | 750 micromhos/cm@25°C                                                 | 2-nitrophenol                | ND           |
| Sodium Adsorption Ratio (SAR)      | 8 -10                                                                 | 4-nitrophenol                | 300 µg/L     |
| Chloride (Cl)                      | 100 mg/L                                                              | p-chloro-m-cresol            | 1.4 mg/L     |
| Sulfates (SO <sub>4</sub> 2-)      | 192 mg/L                                                              | pentachlorophenol            | 1 µg/L       |
| Bicarbonates (HO <sub>3</sub> -)   | Not greater than 50 percent of the total anion concentration in meq/L | phenol                       | 11 mg/L      |
| Aluminum (Al)                      | 5 mg/L                                                                | 2,4,6-trichlorophenol        | 4.1 µg/L     |
| Ammonia (NH <sub>3</sub> -N)       | 30 mg/L                                                               | acenaphthene                 | 2 mg/L       |
| Antimony                           | 0.006 mg/L                                                            | acenaphthylene               | 1 mg/L       |
| Arsenic (As)                       | 0.01 mg/L                                                             | anthracene                   | 10 mg/L      |
| Barium (Ba)                        | 2 mg/L                                                                | benzidine                    | 0.00039 µg/L |
| Beryllium (Be)                     | 0.1 mg/L                                                              | benzo(a)anthracene           | ND           |
| Boron (B)                          | 0.6 mg/L                                                              | benzo(a)pyrene               | 0.2 µg/L     |
| Cadmium (Cd)                       | 0.01 mg/L                                                             | 3,4-benzofluoranthene        | ND           |
| Chromium (Cr)                      | 0.1 mg/L                                                              | benzo(g,h,i) perylene        | ND           |
| Cobalt (Co)                        | 0.05 mg/L                                                             | benzo(k)fluoranthene         | 2.5 µg/L     |
| Copper (Cu)                        | 0.2 mg/L                                                              | bis(2-chloroethoxy) methane  | 59 µg/L      |
| Cyanide (CN)                       | 0.2 mg/L                                                              | bis(2-chloroethyl) ether     | 0.0816 µg/L  |
| Fluoride (F)                       | 4 mg/L                                                                | bis(2-chloroisopropyl) ether | ND           |
| Hydrogen Sulfide(H <sub>2</sub> S) | 4.2 µg/L                                                              | bis (2-ethylhexyl) phthalate | 6 µg/L       |
| Iron (Fe)                          | 5 mg/L                                                                | 4-bromophenyl phenyl ether   | ND           |
| Lead (Pb)                          | 5 mg/L                                                                | butylbenzyl phthalate        | 16 µg/L      |
| Lithium (Li)                       | 0.1 mg/L                                                              | 2-chloronaphthalene          | ND           |

|                                                                                             |            |                                       |              |
|---------------------------------------------------------------------------------------------|------------|---------------------------------------|--------------|
| Manganese (Mn)                                                                              | 0.2 mg/L   | 4-chlorophenyl phenyl ether           | ND           |
| Mercury (Hg)                                                                                | 2 µg/L     | chrysene                              | 89.7 µg/L    |
| Molybdenum                                                                                  | 0.2 mg/L   | dibenzo(a,h)anthracene                | 0.012 µg/L   |
| Nickel (Ni)                                                                                 | 0.2 mg/L   | 1,2-dichlorobenzene                   | 600 µg/L     |
| Nitrate (NO <sub>3</sub> -N)                                                                | 10 mg/L    | 1,3-dichlorobenzene                   | 3 mg/L       |
| Nitrite (NO <sub>2</sub> -N)                                                                | 1 mg/L     | 1,4-dichlorobenzene                   | 75 µg/L      |
| (NO <sub>3</sub> +NO <sub>2</sub> )-N                                                       | 10 mg/L    | 3,3'-dichlorobenzidine                | 0.13 µg/L    |
| Oil & Grease                                                                                | 10 mg/L    | diethyl phthalate                     | 30 mg/L      |
| Phenol                                                                                      | 11 mg/L    | dimethyl phthalate                    | ND           |
| Selenium (Se)                                                                               | 0.02 mg/L  | di-n-butyl phthalate                  | ND           |
| Silver (Ag)                                                                                 | 0.2 mg/L   | 2,4-dinitrotoluene                    | 67 µg/L      |
| Strontium                                                                                   | 20 mg/L    | 2,6-dinitrotoluene                    | 33 µg/L      |
| Thallium                                                                                    | 0.002 mg/L | di-n-octyl phthalate                  | 200 µg/L     |
| Uranium                                                                                     | 30 µg/L    | 1,2-diphenylhydrazine (as azobenzene) | 0.078 µg/L   |
| Vanadium (V)                                                                                | 0.1 mg/L   | fluroranthene                         | ND           |
| Zinc (Zn)                                                                                   | 2 mg/L     | fluorene                              | 1.33 mg/L    |
| RSC                                                                                         | 1.25 meq/L | hexachlorobenzene                     | 1 µg/L       |
| Combined Total Radium 226 and Radium 228                                                    | 5 pCi/L    | hexachlorobutadiene                   | 10 µg/L      |
| "Gross alpha particle radioactivity (including Radium 226 but excluding Radon and Uranium)" | 15 pCi/L   | hexachlorocyclopentadiene             | 50 µg/L      |
| Volatile Organic Compounds, Semi-Volatile Organic Compounds, Polyaromatic Hydrocarbons      |            | hexachloroethane                      | 40 µg/L      |
| acrolein                                                                                    | 17 µg/L    | indeno(1,2,3-cd) pyrene               | 897 µg/L     |
| acrylonitrile                                                                               | 0.17 µg/L  | isophorone                            | 7 mg/L       |
| benzene                                                                                     | 5 µg/L     | N-nitrosodimethylamine                | 0.11 µg/L    |
| bromoform                                                                                   | 80 µg/L    | N-nitrosodi-n-propylamine             | 0.00128 µg/L |
| carbon tetrachloride                                                                        | 5 µg/L     | N-nitrosodiphenylamine                | 18.3 µg/L    |

|                                             |           |                        |            |
|---------------------------------------------|-----------|------------------------|------------|
| chlorobenzene                               | 100 µg/L  | naphthalene            | 700 µg/L   |
| chlorodibromomethane                        | 80 µg/L   | phenanthrene           | 1 mg/L     |
| chloroethane                                | 21 mg/L   | pyrene                 | 1 mg/L     |
| chloroethylvinyl ether                      | ND        | toluene                | 1 mg/L     |
| chloroform                                  | 80 µg/L   | 1,2,4-trichlorobenzene | 70 µg/L    |
| dichlorobromomethane                        | ND        | tetrachloroethylene    | 5 µg/L     |
| 1,1-dichloroethane                          | ND        | Pesticides             |            |
| 1,2-dichloroethane                          | 5 µg/L    | aldrin                 | 1 µg/L     |
| 1,1-dichloroethylene                        | 0.7 µg/L  | alpha-BHC              | 2 µg/L     |
| 1,2-dichloropropane                         | 5 µg/L    | beta-BHC               | 0.050 µg/L |
| 1,3-dichloropropylene (1,3-dichloropropene) | 1 mg/L    | gamma-BHC              | 0.2 µg/L   |
| 1,4-dioxane                                 | 1 mg/L    | delta-BHC              | 0.2 µg/L   |
| ethylbenzene                                | 700 µg/L  | chlordane              | 2 µg/L     |
| ethylene glycol                             | 70 mg/L   | 4,4'-DDT               | 0.264 µg/L |
| 2-ethyl 1-hexanol                           | 0.83 µg/L | 4,4'-DDE               | 0.264 µg/L |
| MBAS (Surfactants)                          | 0.5 mg/L  | 4,4'-DDD               | 0.374µg/L  |
| methyl bromide                              | 47 µg/L   | dieldrin               | 2 µg/L     |
| methyl chloride                             | ND        | alpha-endosulfan       | ND         |
| methylene chloride                          | 5 µg/L    | beta-endosulfan        | ND         |
| nitrobenzene                                | 0.7 mg/L  | endosulfan sulfate     | 110 µg/L   |
| 1,1,2,2-tetrachloroethane                   | 0.5 µg/L  | endrin                 | 2 µg/L     |
| tetrachloroethylene                         | 5 µg/L    | endrin aldehyde        | 2 µg/L     |
| toluene                                     | 1 mg/L    | heptachlor             | 2 µg/L     |
| 1,2-trans-dichloroethylene                  | 1 µg/L    | heptachlor epoxide     | 0.2 µg/L   |
| 1,1,1-trichloroethane                       | 0.2 mg/L  | PCB-1242               | 0.5 µg/L   |
| 1,1,2-trichloroethane                       | 5 µg/L    | PCB-1254               | 0.5 µg/L   |
| trichloroethylene                           | 5 µg/L    | PCB-1221               | 0.5 µg/L   |
| vinyl chloride                              | 2 µg/L    | PCB-1232               | 0.5 µg/L   |
| 2-chlorophenol                              | 0.2 mg/L  | PCB-1248               | 0.5 µg/L   |

|                    |          |           |          |
|--------------------|----------|-----------|----------|
| 2,4-dichlorophenol | 0.1 mg/L | PCB-1260  | 0.5 µg/L |
| 2,4-dimethylphenol | 667 µg/L | PCB-1016  | 0.5 µg/L |
|                    |          | toxaphene | 3 µg/L   |

Note:

1. Laboratory analysis of treated produced water must be conducted according to test procedures approved under 40 CFR Part 136 unless other test procedures have been authorized in writing by the department.
2. Laboratory results for cations, anions and metals are to be reported as Total Recoverable.
3. Where laboratory methods are not capable of achieving detection at, or below the permissible limit, a result of non-detectable will be accepted provided that the method used is capable of achieving the lowest detection limit.
4. Pesticide analyses are required unless it is documented that one or more have not been used.
5. µg/L-micrograms per liter
6. mg/L-milligrams per liter
7. ND - non-detect
8. meq/L-milliequivalents per liter
9. pCi/L -picocuries per liter
10. s.u. - standard unit
